# Supplementary material
Source: Research Square preprint supplement (doi:10.21203/rs.3.rs-10367040/v1)
Supplement: Supplementary file 1 [file c09c828fca1cd01c9a7b56dd.docx]

Supporting Information For:

**Methane emissions from inland waters are constrained by salinity**

**Authors:**

Yang Deng1, Xiang Zhu 1, Lei Xie 1, Fei Yang1,*, Xiaoguang Xu2, Yuying Ma1, Fuquan Peng1, Yaoqing Peng2, Shunmei Zhu2, Qinglong Yin3,Qiu Jin4, Liangang Chen4, Longmian Wang1,*

**Content:**

**Fig.S1** **Locations of sampling points across the study area**.

**Fig.S2** Variations in DOM fluorescence components across the salinity gradient. Significant correlation at the ***p* < 0.01.

**Fig.S3** Van Krevelen diagrams of DOM from FT-ICR MS analysis: (a) low-salinity (LS), (b) high-salinity (HS); (c)-(h) present the variations in each DOM component between the LS and HS groups. Significant correlation at the ***p* < 0.01; No significant correlation at the ns.

**Fig.S4** Relationships of CH4 with DOM content (a, e) and optical properties (b-d, f-h). Significant correlation at the ***p* < 0.01; No significant correlation at the *p* > 0.05.

**Supporting Figures:**


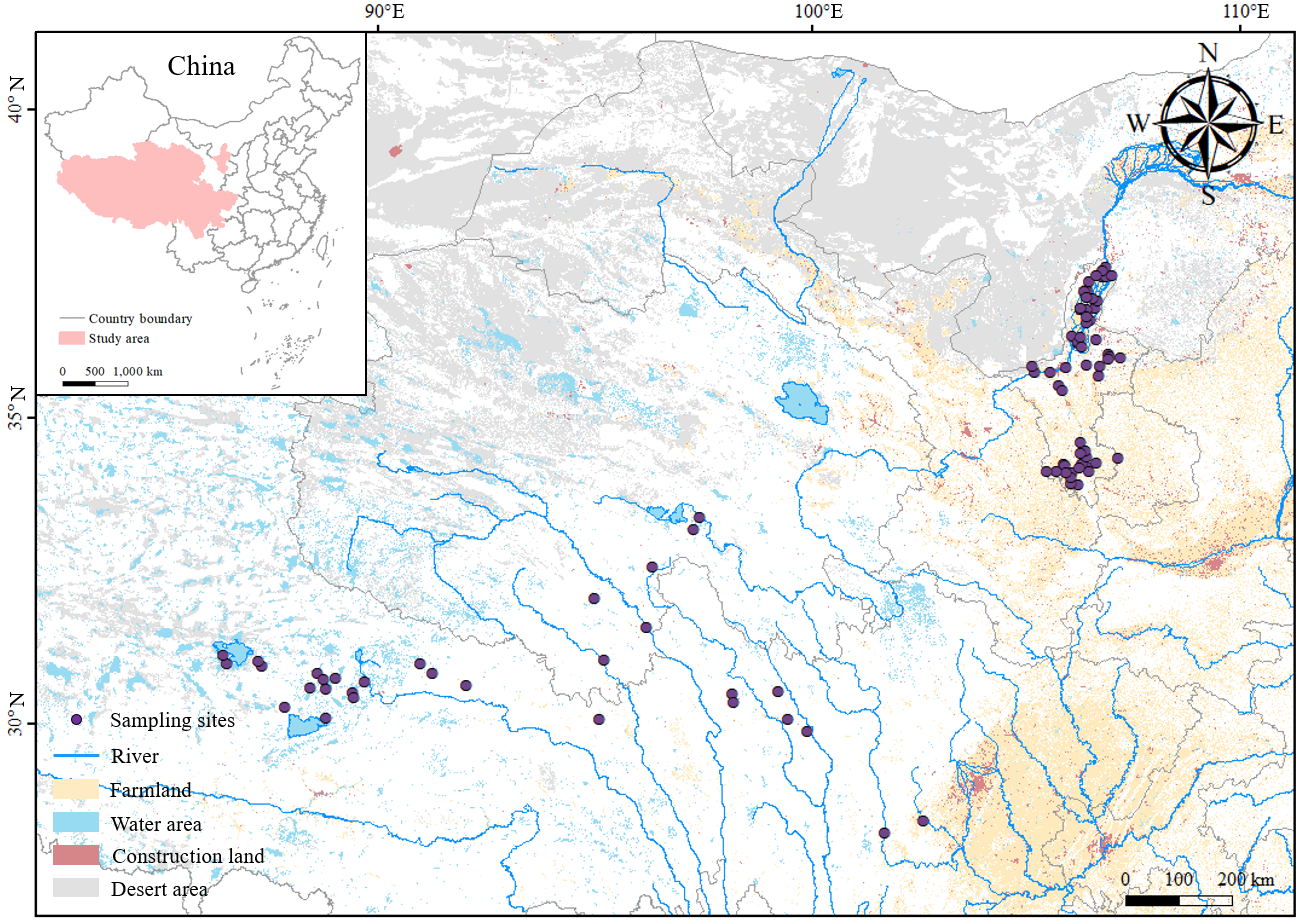


**Fig.S1.** **Locations of sampling points across the study area**.


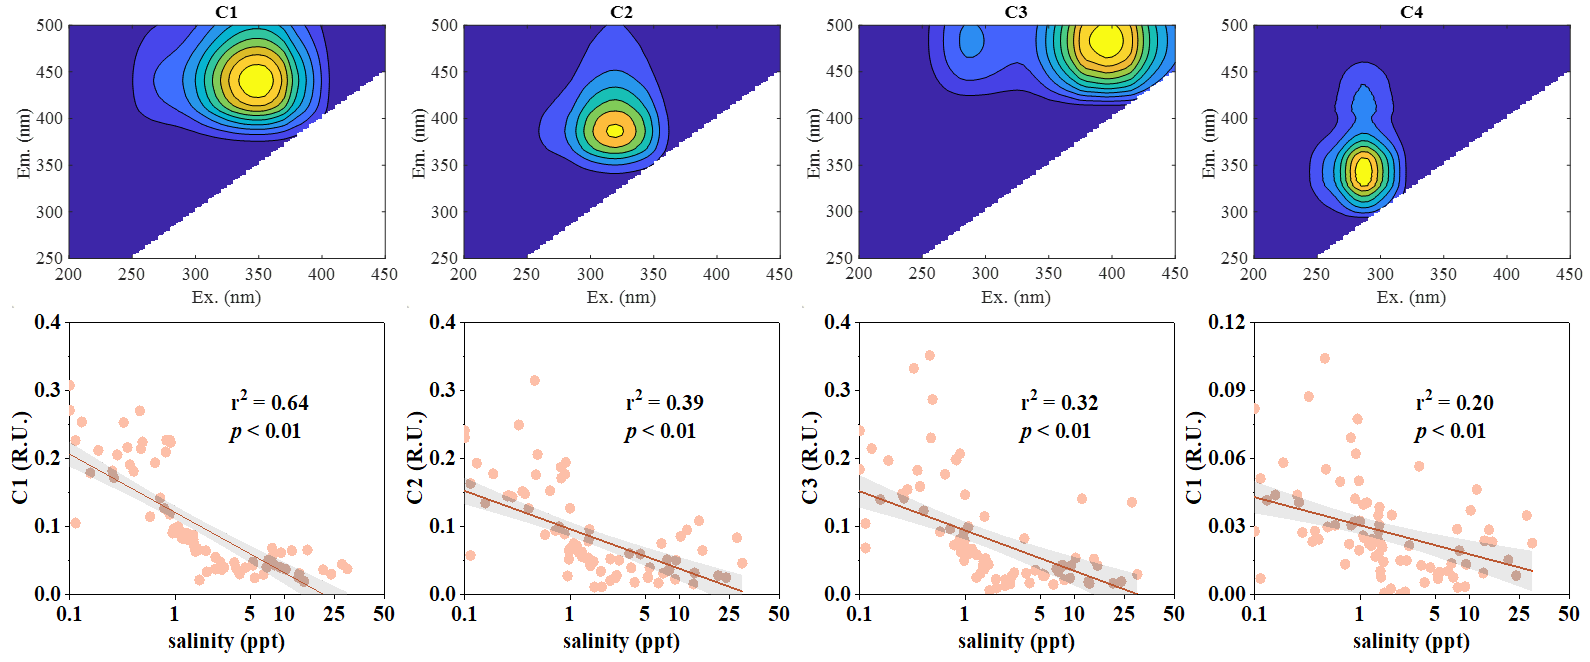


**Fig.S2.** Variations in DOM fluorescence components across the salinity gradient. Significant correlation at the ***p* < 0.01.


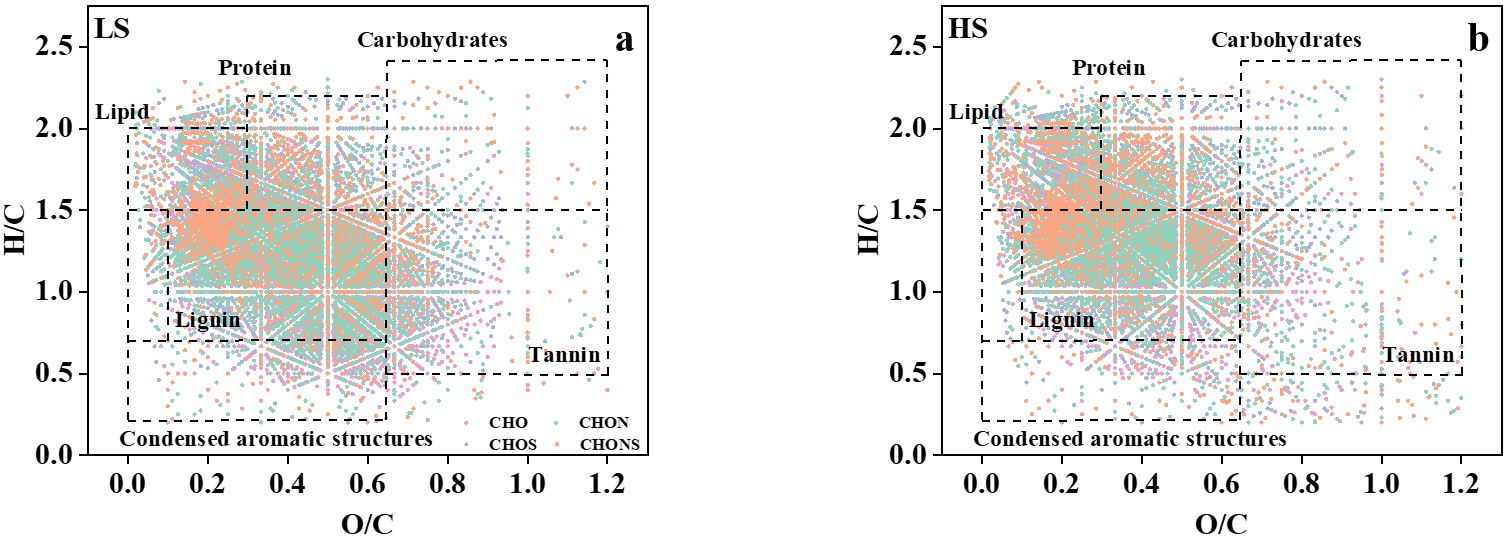


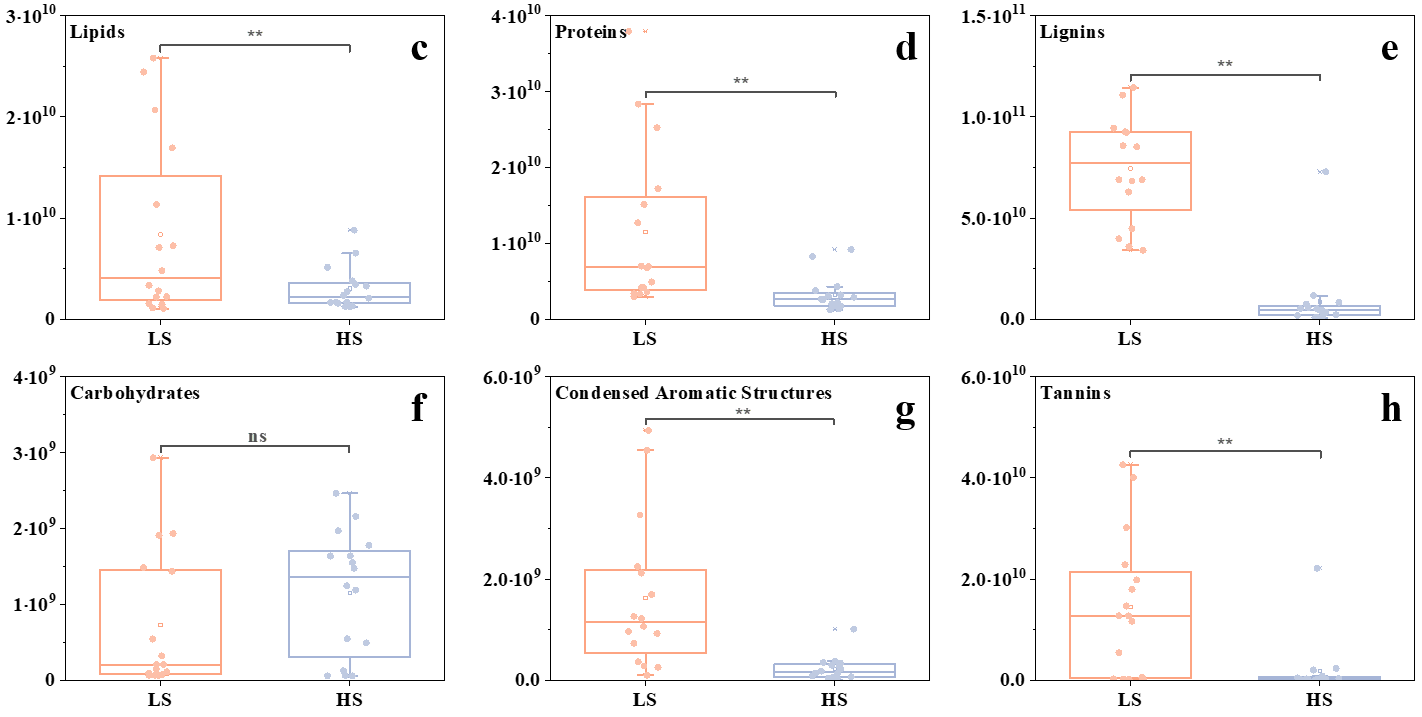


**Fig.S3.** Van Krevelen diagrams of DOM from FT-ICR MS analysis: (a) low-salinity (LS), (b) high-salinity (HS); (c)-(h) present the variations in each DOM component between the LS and HS groups. Significant correlation at the ***p* < 0.01; No significant correlation at the ns.


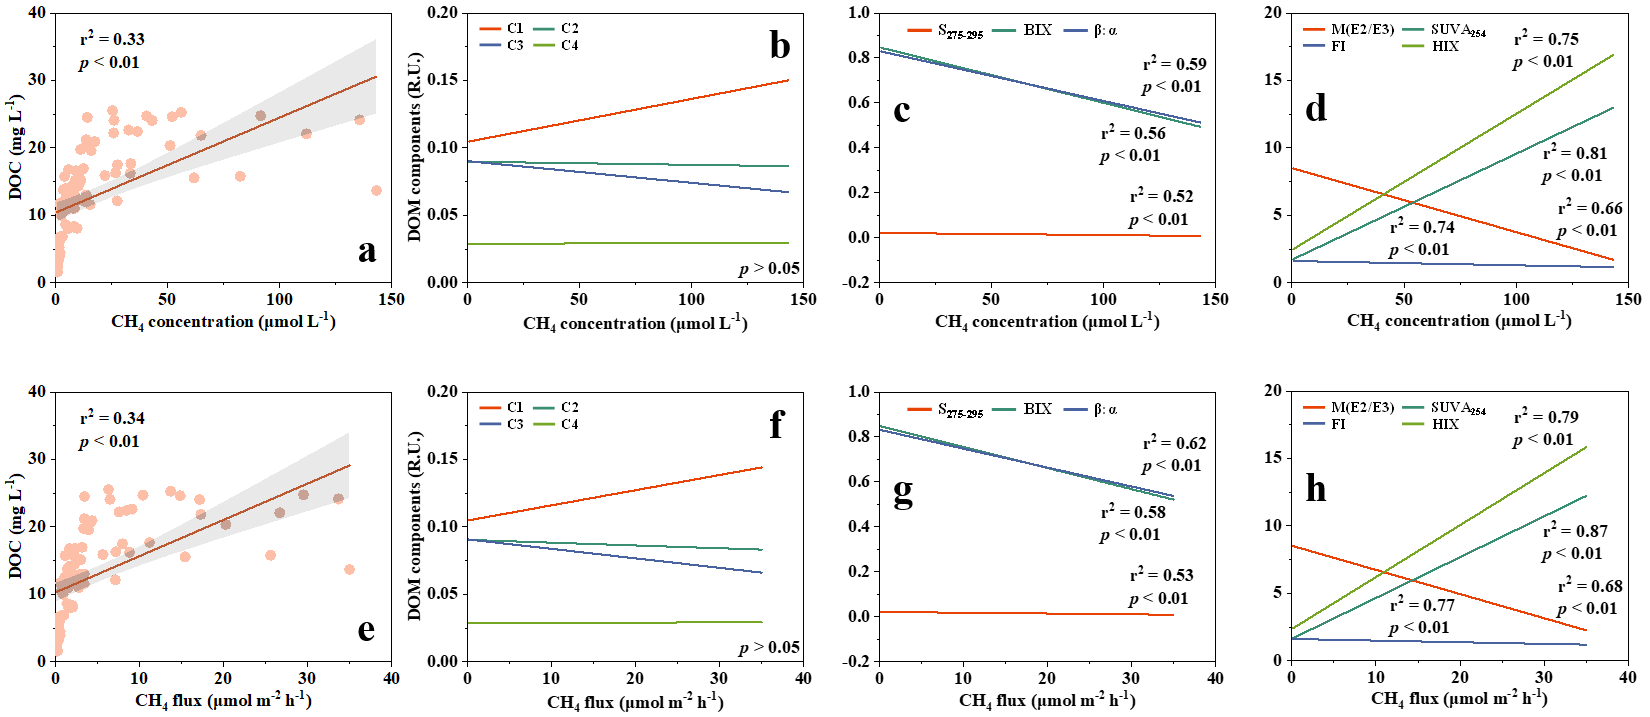


**Fig.S4.** Relationships of CH4 with DOM content (a, e) and optical properties (b-d, f-h). Significant correlation at the ***p* < 0.01; No significant correlation at the *p* > 0.05.

**Supporting Text:**

**Supporting Text S2.** The relationship between DOM fluorescent components and salinity.

By combining 3D-EEM technology with the PARAFAC model, the fluorescence components of DOM in 90 water bodies were investigated (Fig.S1). A total of four fluorescence components were identified, accounting for more than 95% of the EEM variance. C1 (Ex: < 290 (330-400) nm; Em: 400-500 nm) was classified as a humic-like component of terrestrial origin1. C2 (Exmax: 318 nm; Emmax: 445 nm) was classified as a marine humic-like substance2. C3 (Exmax: 400 nm; Emmax: 477 nm) was identified as a terrestrial humic acid3,4. C4 (Exmax: 280 nm; Emmax: 340 nm) exhibited fluorescence similar to C5 reported in Menendez et al. (2024) and was associated with tryptophan-like substances5. The maximum fluorescence intensities (Fmax) of both the humic-like components (C1, C2, C3) and the protein-like component (C4) were negatively correlated with salinity. This suggests that increasing salinity may enhance the adsorption capacity of DOM onto sediment particles, promoting its burial in sediments and thereby contributing to carbon sink formation6. Furthermore, the negative correlation between the Fmax of C4 and salinity may also be attributed to salinity-induced changes in microbial community composition and activity, which may allow certain labile DOM components to be preferentially utilized by specific halotolerant microorganisms7.

**Methods:**

The three-dimensional excitation-emission matrix (3D-EEM) spectra of the water samples were measured using a steady-state fluorescence spectrometer (FM-4P-TCSPC). The excitation wavelength ranged from 200 to 500 nm, and the emission wavelength ranged from 250 to 550 nm, with a scanning interval of 5 nm. The excitation and emission slit widths were both set to 10 nm, and all measurements were performed at a scanning speed of 1200 nm/min. Background subtraction was carried out using ultrapure water to eliminate most of the Raman scattering from each DOM spectrum. Parallel factor analysis (PARAFAC) was conducted following Chen et al. (2021) using the DOM Fluor toolbox in MATLAB R2019a8. To ensure accurate fluorescence component identification, PARAFAC models with four to eight components were constructed, and the four-component model was validated through split-half analysis, residual analysis, and loading analysis. The maximum fluorescence intensity (Fmax) was used to represent the fluorescence information across all data9.

**Supporting References:**

1. Shutova, Y., Baker, A., Bridgeman, J., et al. Spectroscopic characterisation of dissolved organic matter changes in drinking water treatment: From PARAFAC analysis to online monitoring wavelengths. *Water Research* **54**, 159-169 (2014).
2. Wünsch, U.J., Murphy, K. A simple method to isolate fluorescence spectra from small dissolved organic matter datasets. *Water Research* **190**, 116730 (2021).
3. Graeber, D., Tenzin, Y., Stutter, M., et al. Bioavailable DOC: reactive nutrient ratios control heterotrophic nutrient assimilation-An experimental proof of the macronutrient-access hypothesis. *Biogeochemistry* **155**, 1-20 (2021).
4. Liu, C., Shen, Q.S., Gu, X.Z., et al. Burial or mineralization: Origins and fates of organic matter in the water–suspended particulate matter-sediment of macrophyte- and algae-dominated areas in Lake Taihu. *Water Research* **243**, 120414 (2023).
5. Menendez, A., Tzortziou, M., et al. Driving factors of colored dissolved organic matter dynamics across a complex urbanized estuary. *Science of The Total Environment* **921**, 171083 (2024).
6. Xie, L., Zuo, D.Z., Ma, Y.S., et al. The bacterial influencing mechanisms of salinity fluctuations in a brackish-water lake on the dissolved organic matter characteristics of pore water. *Organic Geochemistry* **189**, 104744 (2024).
7. Yang, J., Jiang, H.C., Liu, W., et al. Potential utilization of terrestrially derived dissolved organic matter by aquatic microbial communities in saline lakes. *The ISME Journal* **14**, 2313-2324 (2020).
8. Chen, M.L., Li, C.L., Spencer, R.G.M., et al. Climatic, land cover, and anthropogenic controls on dissolved organic matter quantity and quality from major alpine rivers across the Himalayan-Tibetan Plateau. *Science of the Total Environment* **754**, 142411 (2021).
9. Jutaporn, P., Laolertworakul, W., Tungsudjawong, K., et al. Parallel factor analysis of fluorescence excitation emissions to identify seasonal and watershed differences in trihalomethane precursors. *Chemosphere* **282**, 131061 (2021).
